# Supplementary material
Source: HighWire-hosted journal article supplement (https://jnm.snmjournals.org/highwire/filestream/104769/field_highwire_adjunct_files/0/256727_Supplemental_Data.pdf)
Supplement: 256727_Supplemental_Data.pdf [file 256727_Supplemental_Data.pdf]

**SUPPLEMENTAL FIGURE 1. Step-by-step demonstration of tumor segmentation method using a semi-automated whole-body tumor volume contouring software**

Whole body DTTV was generated using the in house developed automated segmentation tool using reference tissues as threshold. For each patient, PET masks were defined by all somatic voxels having values above a defined threshold, and then regions of normal uptake were manually removed leaving only those corresponding to the tumors.

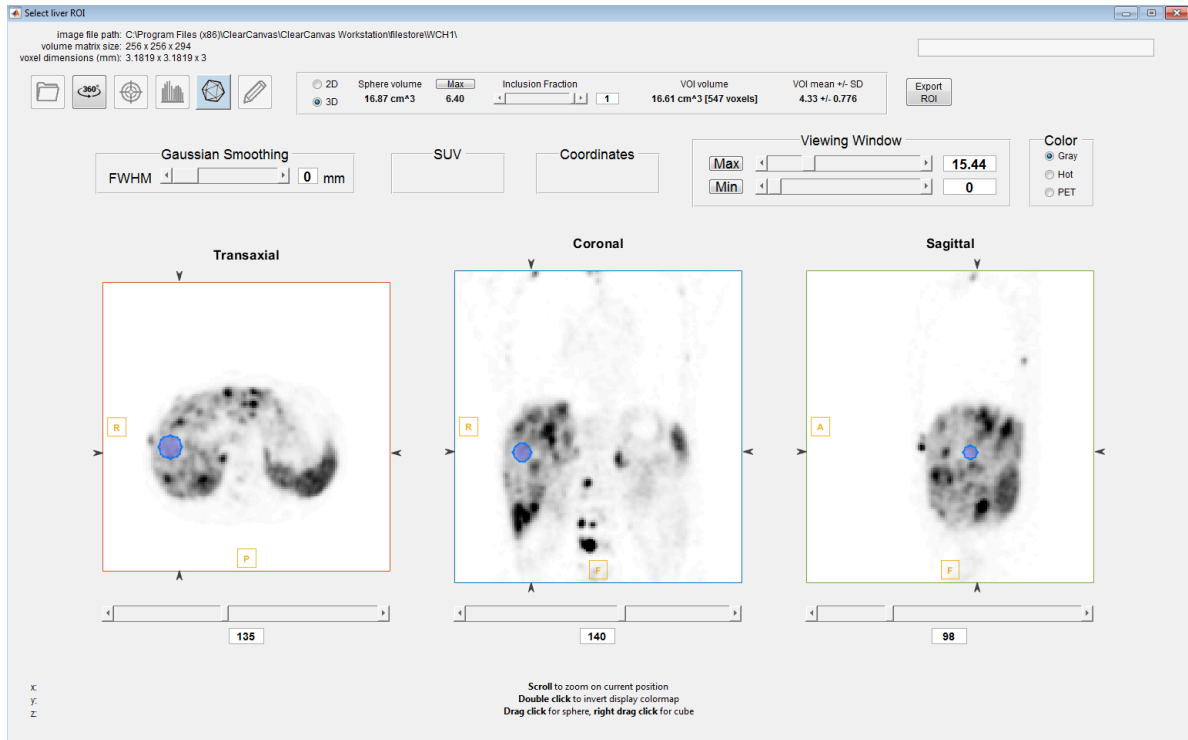

**Supplemental Figure 1A:** Step 1. A VOI is placed in normal liver parenchyma (avoiding metastases if present) to define the lower threshold used for segmentation

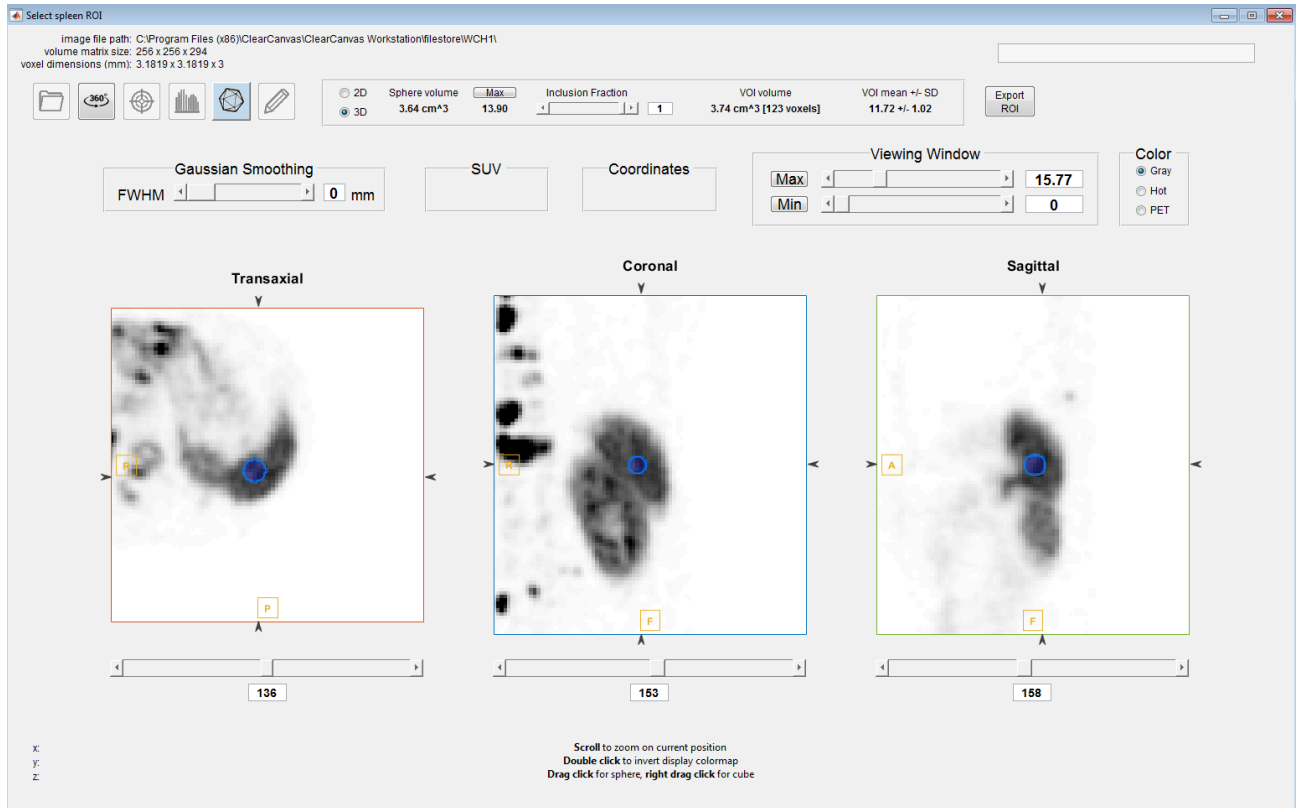

**Supplemental Figure 1B:** Step 2. A VOI is placed in normal spleen parenchyma to defined upper threshold for volume segmentation.

| Use?                                | Method  | Threshold |           |      |   |          |   |      |
|-------------------------------------|---------|-----------|-----------|------|---|----------|---|------|
|                                     |         | Max       | Mean+X*SD | Mean | X | Std. Dev |   |      |
| <input checked="" type="checkbox"/> | Liver   | 6.4       | 6.6 =     | 4.3  | + | 3        | * | 0.78 |
| <input checked="" type="checkbox"/> | Spleen  | 13.9      | 14.8 =    | 11.7 | + | 3        | * | 1.02 |
| <input type="checkbox"/>            | Parotid |           |           |      | + |          | * |      |
| <input type="checkbox"/>            | Blood   |           |           |      | + |          | * |      |
| <input type="checkbox"/>            | Manual  |           |           |      |   |          |   |      |

**GO**

**Supplemental Figure 1C:** Step 3. After the thresholds are defined, the software will automatically generate a mask with all the somatic voxels containing values above the defined threshold.

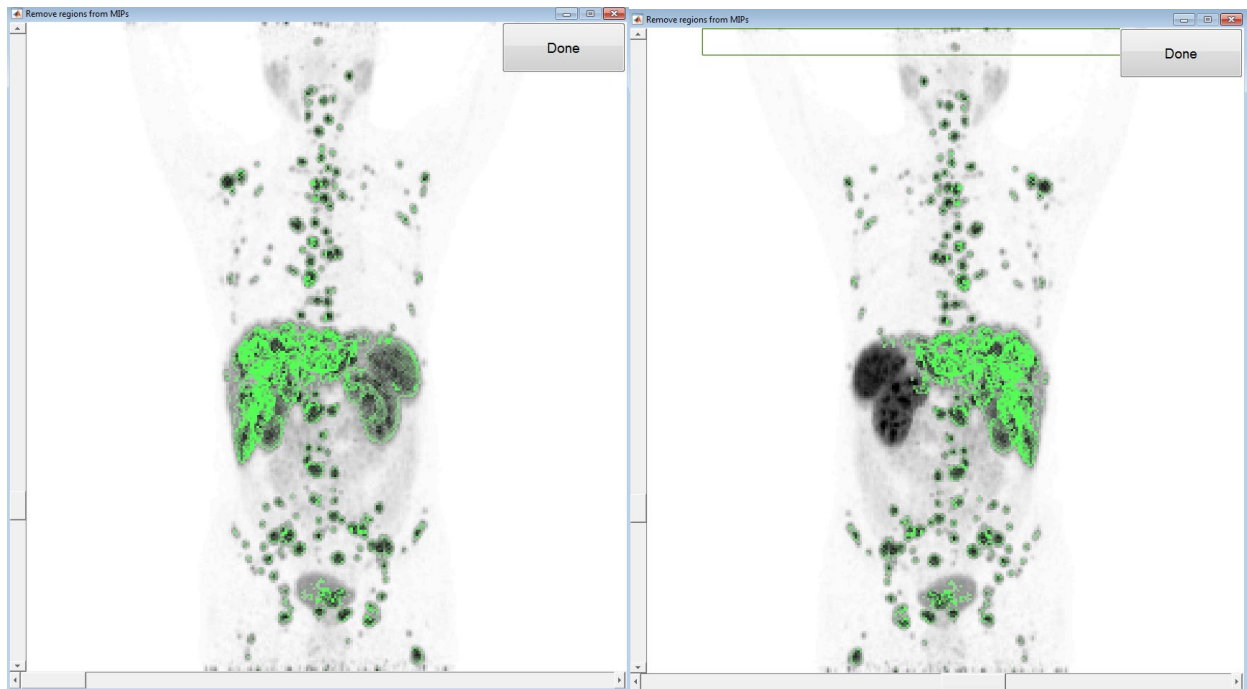

**Supplemental Figure 1D:** Step 4. From the generated mask, all areas of physiologic tracer uptake are manually removed (in 3D mode).

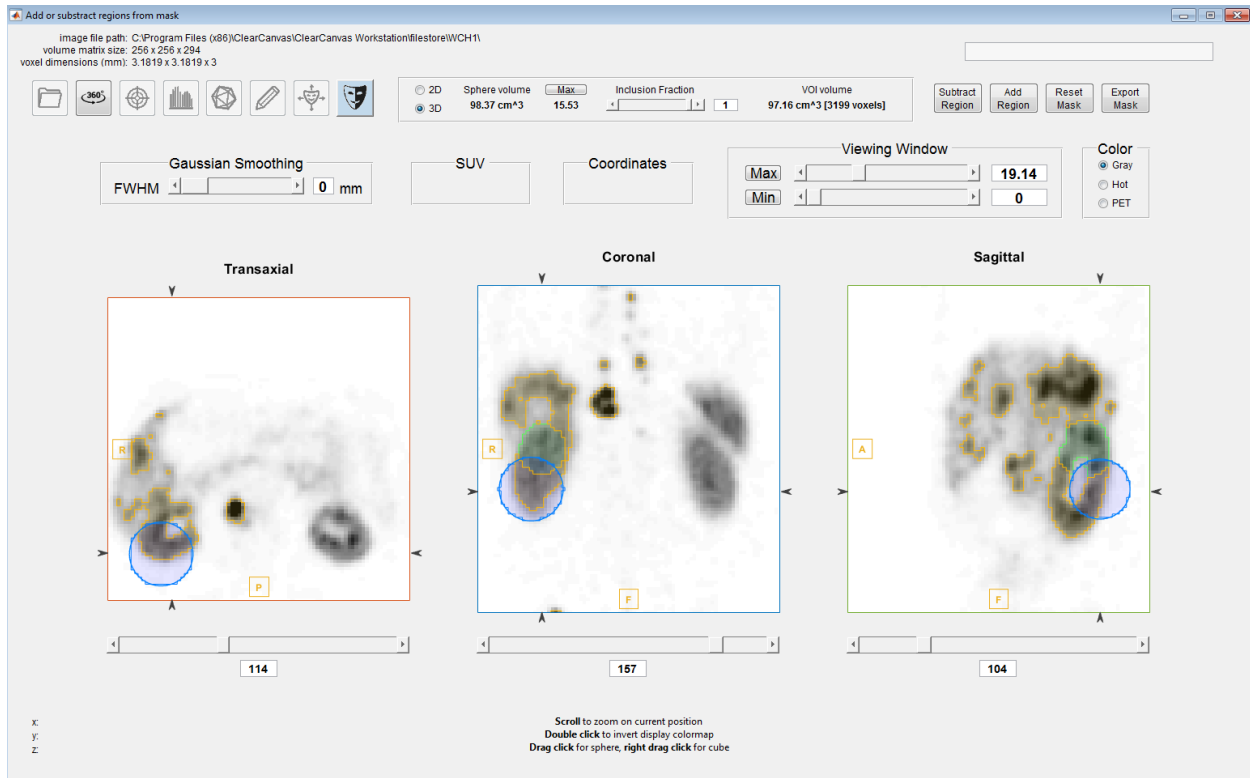

**Supplemental Figure 1E:** Step 5. Further correction of the segmentation using 2D images.

|   | A       | B                  | C                   | D                 | E                  | F           | G                   | H                    | I |
|---|---------|--------------------|---------------------|-------------------|--------------------|-------------|---------------------|----------------------|---|
| 1 | Subject | Ref SUVmax (LIVER) | Ref SUVmax (SPLEEN) | TV volume (LIVER) | TV volume (SPLEEN) | TV SUV max  | TV SUV mean (LIVER) | TV SUV mean (SPLEEN) |   |
| 2 | WCH1    | 6.4                | 13.9                | 726.8369751       | 147.4935455        | 61.25040817 | 11.55508232         | 21.76831436          |   |
| 3 |         |                    |                     |                   |                    |             |                     |                      |   |

**Supplemental Figure 1F:** Step 6. The obtained results from the generated volumes are presented in a spreadsheet. These includes: The references values of the defined thresholds, the volume of the tumor (in cc), and the SUVmax and SUVmean within the tumor volume using liver and spleen as thresholds.

**Supplemental Table 1. iPET / bPET ratios**

| <b>iPET / bPET ratios</b> |                                         |                         |                         |                         |                |
|---------------------------|-----------------------------------------|-------------------------|-------------------------|-------------------------|----------------|
|                           |                                         | <b>All</b><br>(n=36)    | <b>R</b><br>(n=30)      | <b>NR</b><br>(n=6)      | <b>p-value</b> |
| <b>Reference</b>          | <b>SUVmaxLiver</b>                      | 1.1 ± 0.2<br>(0.7, 1.8) | 0.9 ± 0.2<br>(0.8,1.2)  | 1.1 ± 0.4<br>(0.6, 2.2) | <b>0.046</b>   |
| <b>Tissue</b>             |                                         |                         |                         |                         |                |
| Median±SD<br>(min max)    | <b>SUVmaxSpleen*</b>                    | 1.2 ± 0.4<br>(0.6, 2.2) | 1.2 ± 0.4<br>(0.6, 2.2) | 1.1 ± 0.3<br>(0.8, 1.5) | 0.28           |
| <b>Lesion-based</b>       | <b>MeanSUVmax</b>                       | 0.9±0.3<br>(0.3,1.9)    | 0.9±0.3<br>(0.3,1.9)    | 0.8±0.1<br>(0.6,1)      | 0.24           |
| Median±SD<br>(min,max)    | <b>MeanSUVmaxT/L</b>                    | 0.8±0.3<br>(0.2,1.4)    | 0.8±0.3<br>(0.2,1.4)    | 0.8±0.2<br>(0.6,1.1)    | 0.85           |
|                           | <b>MeanSUVmaxT/S*</b>                   | 0.8±0.2<br>(0.2,1.4)    | 0.8±0.3<br>(0.2,1.4)    | 0.7±0.2<br>(0.5,1)      | 0.82           |
| <b>DTTV</b>               | <b>DTTV<sub>liver(cc)</sub></b>         | 0.8 ± 0.6<br>(0.2,3.3)  | 0.8 ± 0.7<br>(0.2,3.3)  | 0.8 ± 0.5<br>(0.5,1.7)  | 0.45           |
| Median±SD<br>(min,max)    | <b>DTTV<sub>spleen(cc)</sub></b>        | 0.7 ± 0.8<br>(0,4.1)    | 0.8 ± 0.8<br>(0,4.1)    | 0.8 ± 0.3<br>(0,4.1.1)  | 0.81           |
|                           | <b>DTTVSUV<sub>max</sub></b>            | 0±0.3<br>(-0.9,1)       | 0±0.4<br>(-0.9,1)       | 0.2±0.2<br>(-0.1,0.3)   | 0.22           |
|                           | <b>DTTV<br/>SUV<sub>mean</sub>Liver</b> | 0.7±0.3<br>(0,1.9)      | 0.6±0.1<br>(0,1.9)      | 0.7±0.3<br>(0.6,0.8)    | 0.45           |

|                                                |                                                |                      |                      |                      |      |
|------------------------------------------------|------------------------------------------------|----------------------|----------------------|----------------------|------|
|                                                | <b>DTTV</b><br><b>SUV<sub>mean</sub>Spleen</b> | 1.1±0.4<br>(0,1.9)   | 1.1±0.5<br>(0,1.9)   | 1.1±0.2<br>(0.8,1.3) | 0.56 |
| <b>Heterogeneity</b><br>Median±SD<br>(min,max) | <b>CoV</b>                                     | 0.9±0.5<br>(0.3,1.9) | 0.9±0.5<br>(0.3,1.9) | 0.9±0.3<br>(0.6,1.2) | 0.6  |
|                                                | <b>Skewness</b>                                | 0.9±1.5<br>(0.1,8.8) | 1±1.6<br>(0.1,8.8)   | 0.7±0.8<br>(0.2,2.5) | 0.29 |
|                                                | <b>Kurtosis</b>                                | 0.9±1.3<br>(0.1,4.9) | 0.7±1.3<br>(0.1,4.9) | 0.9±1.4<br>(0.2,3.8) | 0.31 |

**Supplemental Table 1.** Interim PET (iPET)/bPET ratios for reference tissues, lesion-based tumor parameters, DTTV parameters and first order heterogeneity measures.

P-values are shown. R=responders; NR=non-responders; DTTV=DOTATATE tumor volume;

SUV<sub>max</sub>T/L = meanSUV<sub>max</sub>/ SUV<sub>max</sub> liver; SUV<sub>max</sub>T/S= meanSUV<sub>max</sub>/ SUV<sub>max</sub> spleen.

SUV<sub>mean</sub>Liver/ spleen=meanSUV in segmented volume using liver/spleen as threshold.

SD=standard deviation; CoV=coefficient of variance.



| UVA                      |                                 | HR (95%CI)       | p-value       |
|--------------------------|---------------------------------|------------------|---------------|
| <b>bPET Parameter</b>    |                                 |                  |               |
| <b>Demographic</b>       | Age                             | 0.97 (0.93,1.02) | 0.24          |
|                          | Gender                          |                  | 0.4           |
|                          | F                               | Reference        |               |
|                          | M                               | 1.54 (0.57,4.16) |               |
|                          | Ki 67                           | 0.99 (0.93,1.05) | 0.67          |
| <b>Reference tissues</b> | Reference SUVmax                | 1.13 (0.78,1.63) | 0.52          |
|                          | Liver                           |                  |               |
|                          | Reference SUVmax                | 0.99 (0.92,1.06) | 0.72          |
|                          | Spleen*                         |                  |               |
| <b>Lesion-based</b>      | Mean SUVmax                     | 0.98 (0.97,1)    | <b>0.023</b>  |
|                          | SUVmax T/L                      | 0.92 (0.85,0.99) | <b>0.028</b>  |
|                          | SUVmax T/S                      | 0.86 (0.75,1)    | <b>0.047</b>  |
| <b>Tumor volume</b>      | DTTV <sub>Liver</sub>           | 1 (1,1)          | 0.99          |
|                          | DTTV <sub>Spleen</sub>          | 1 (1,1)          | 0.61          |
|                          | DTTV SUV max                    | 0.99 (0.99,1)    | 0.13          |
|                          | DTTV SUV <sub>mean</sub> Liver  | 0.92 (0.87,0.98) | <b>0.0053</b> |
|                          | DTTV SUV <sub>mean</sub> Spleen | 0.98 (0.95,1.01) | 0.13          |
| <b>Heterogeneity</b>     | CoV                             | 0.62 (0.14,2.67) | 0.52          |
|                          | Skewness                        | 1.49 (1.07,2.07) | <b>0.017</b>  |
|                          | Kurtosis                        | 1.06 (1.01,1.11) | <b>0.022</b>  |

| <b>iPET Parameter</b>          |                                 |                    |              |
|--------------------------------|---------------------------------|--------------------|--------------|
| <b>Reference tissues</b>       | Reference SUVmax                | 0.89 (0.61,1.28)   | 0.53         |
|                                | Liver                           |                    |              |
|                                | Reference SUVmax                | 0.98 (0.91,1.05)   | 0.55         |
|                                | Spleen*                         |                    |              |
| <b>Lesion-based</b>            | Mean SUVmax                     | 1 (0.97,1.03)      | 0.96         |
|                                | SUVmax T/L                      | 0.99 (0.87,1.13)   | 0.88         |
|                                | SUVmax T/S                      | 0.9 (0.6,1.33)     | 0.59         |
| <b>Tumor volume</b>            | DTTV <sub>Liver</sub>           | 1 (1,1)            | 0.83         |
|                                | DTTV <sub>Spleen</sub>          | 1 (1,1)            | 0.5          |
|                                | DTTV SUVmax                     | 1 (0.99, 1.01)     | 0.96         |
|                                | DTTV SUV <sub>mean</sub> Liver  | 0.95 (0.86, 1.06)  | 0.36         |
|                                | DTTV SUV <sub>mean</sub> Spleen | 0.99 (0.95, 1.03)  | 0.69         |
| <b>Heterogeneity</b>           | CoV                             | 1.57 (0.07, 38.08) | 0.78         |
|                                | Skewness                        | 1.41 (0.72,2.77)   | 0.32         |
|                                | Kurtosis                        | 1.07 (0.95,1.2)    | 0.27         |
| <b>iPET/bPET ratios</b>        |                                 |                    |              |
| <b>Reference tissues ratio</b> | Reference SUVmax                | 0.01 (2.1e-04,0.5) | <b>0.021</b> |
|                                | Liver                           |                    |              |
|                                | Reference SUVmax                | 0.42 (0.05,3.45)   | 0.42         |
|                                | Spleen*                         |                    |              |
| <b>Lesion-based ratio</b>      | Mean SUVmax                     | 0.49 (0.09,2.59)   | 0.4          |
|                                | SUVmax T/L                      | 1.31 (0.21,8.04)   | 0.77         |

|                            |                                 |                  |      |
|----------------------------|---------------------------------|------------------|------|
|                            | SUVmax T/S                      | 0.66 (0.09,5.09) | 0.69 |
| <b>Tumor volume ratio</b>  | DTTV <sub>Liver</sub>           | 1.29 (0.62,2.7)  | 0.49 |
|                            | DTTV <sub>Spleen</sub>          | 0.79 (0.29,2.11) | 0.64 |
|                            | DTTV SUVmax                     | 0.48 (0.07,3.27) | 0.46 |
|                            | DTTV SUV <sub>mean</sub> Liver  | 0.97 (0.11,8.24) | 0.98 |
|                            | DTTV SUV <sub>mean</sub> Spleen | 1.24 (0.3,5.15)  | 0.63 |
| <b>Heterogeneity ratio</b> | CoV                             | 0.75 (0.2,2.77)  | 0.66 |
|                            | Skewness                        | 1 (0.57,1.75)    | 0.99 |
|                            | Kurtosis                        | 1.15 (0.75,1.76) | 0.53 |

**Supplemental Table 2.** Complete univariate analysis of lesions-based, TV based and heterogeneity parameters including at baseline (bPET), interim PET (iPET), and iPET/bPET ratios as predictors of PFS.

P-values of Cox proportional hazards model are shown. HR=hazard ratio; 95% CI=95% confidence interval; SUVmax T/L=mean SUVmax/ SUVmax liver; SUVmax T/S=mean SUVmax/SUVmax spleen;

DTTV<sub>Liver/spleen</sub>= <sup>68</sup>Ga-DOTATATE tumor volume with liver or spleen as threshold; DTTV SUV<sub>mean</sub> Liver/Spleen=meanSUV from tumor volume obtained with liver or spleen as threshold. CoV=coefficient of variance. PFS=progression free survival.
